# Supplementary material
Source: PubMed Central journal article supplement (PMC5173414)
Supplement: NIHMS828325-supplement-1.pdf [file NIHMS828325-supplement-1.pdf]

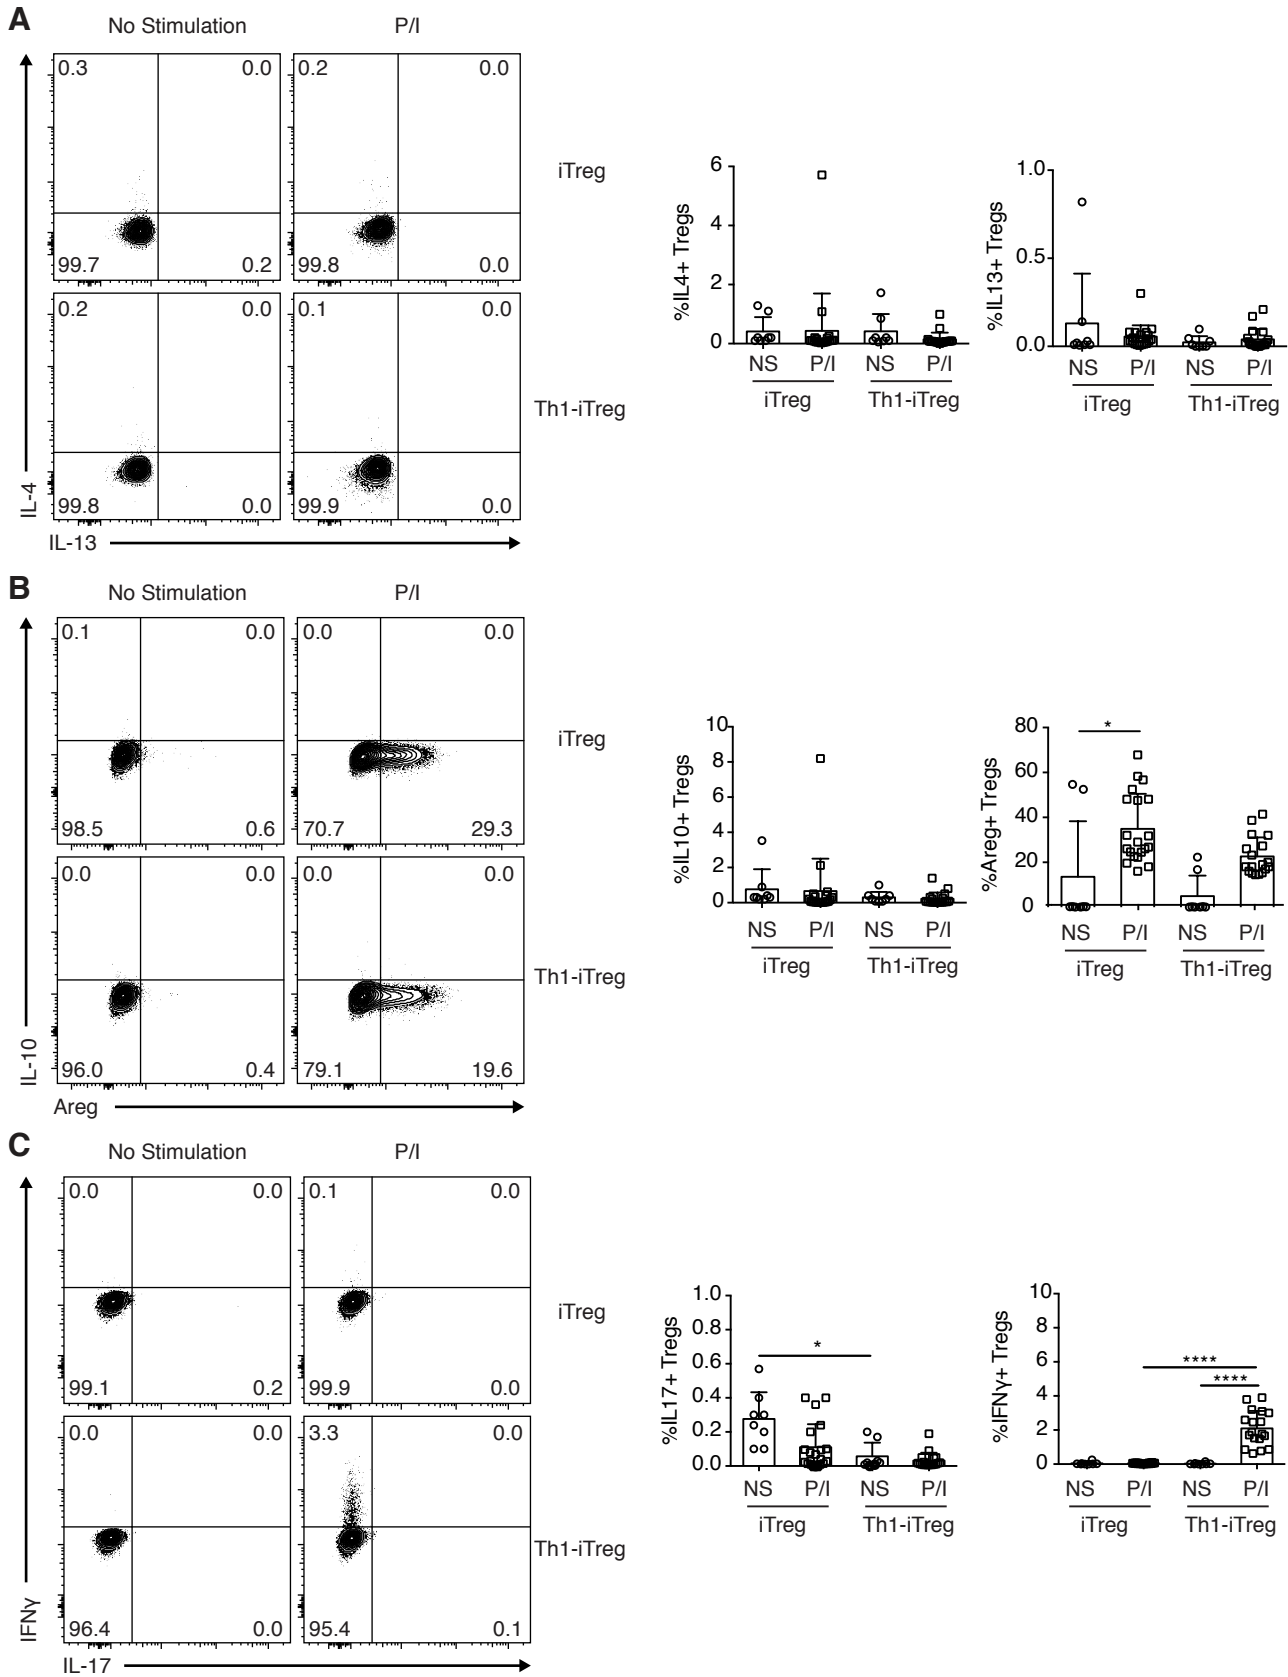

**Supplemental 1. Cytokine production by in vitro-generated iTregs and Th1-iTregs.** Representative plots (left) and summary graphs (right) of cytokine production from iTregs and Th1-iTregs: (A) IL-4, IL-13, (B) IL-10, amphiregulin, and (C) IL-17, and IFN $\gamma$  with and without PMA and ionomycin (P/I) stimulation. Results are representative of three experiments of  $n = 3$ /group in technical duplicate; error bars are the SD. \* $P < 0.05$ , \*\*\*\* $P < 0.0001$ ; Kruskal-Wallis test.

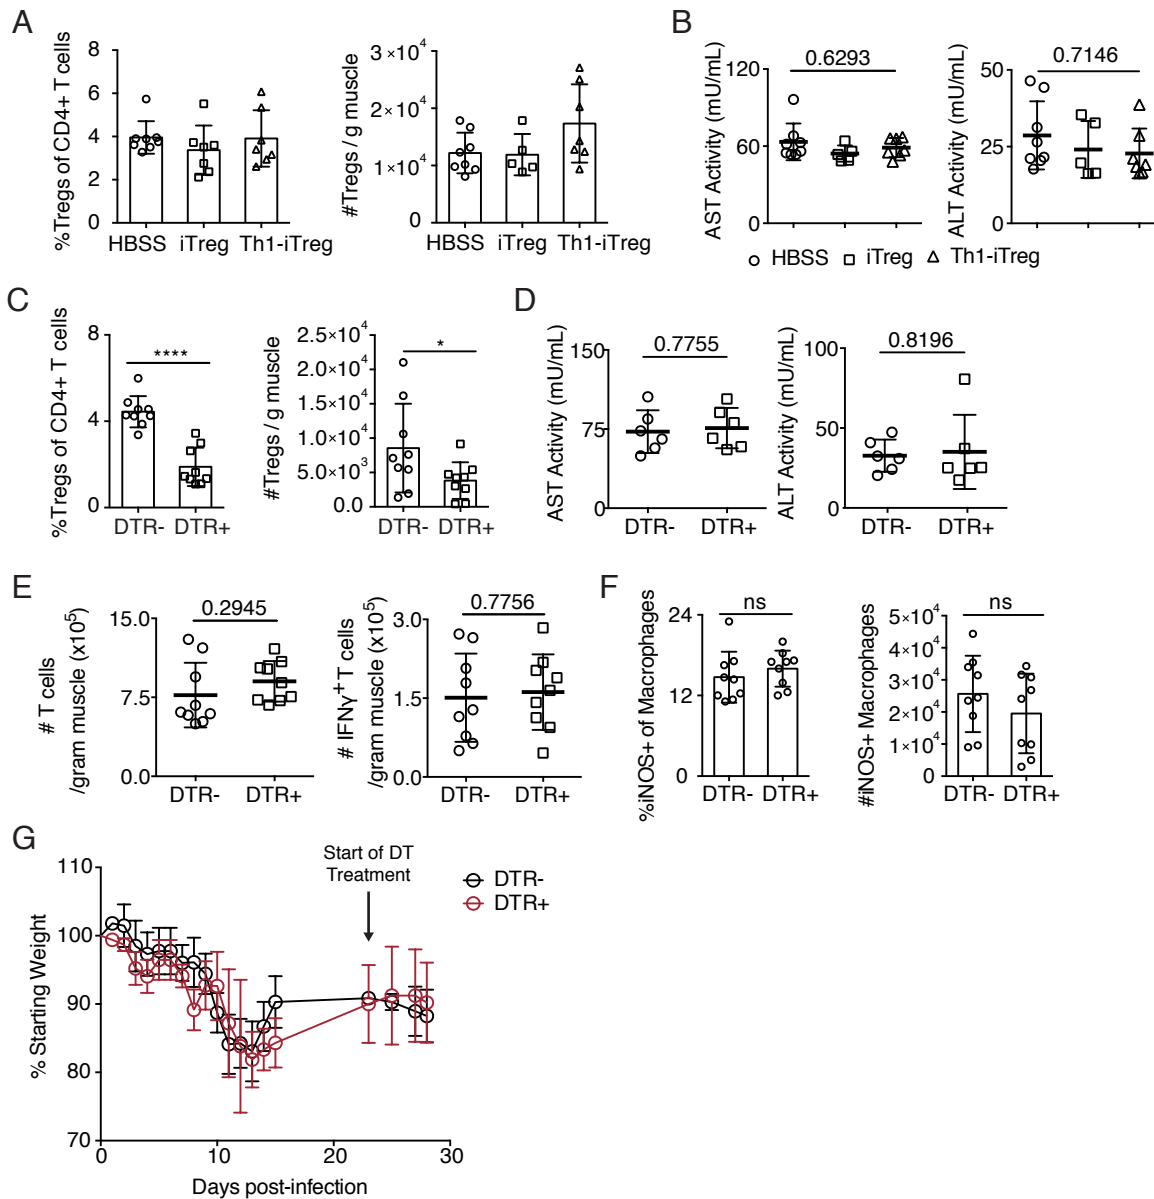

**Supplemental 2. Effects of Treg adoptive transfer and depletion studies on skeletal muscle cellular compartments and immunopathology.** (A) Frequency and absolute number of skeletal muscle Tregs and (B) serum liver enzyme levels (AST/ALT) six days after Treg adoptive transfer. (A-B) Results are representative of  $n \geq 5$  per group from two experiments. (C) Frequency and absolute number of skeletal muscle Tregs and (D) serum liver enzyme levels (AST/ALT) following DT treatment. (E) Absolute numbers of total T cells (TCR $\beta$ +) and ex vivo IFN $\gamma$  producing T cells (TCR $\beta$ +IFN $\gamma$ +) quantified by FACS following DT treatment. (F) Frequency (left) and absolute number (right) of macrophages (CD11b+Ly6G-CD68) expressing iNOS after Treg depletion. (G) Weight curve throughout Treg depletion study. (C-G) Results are representative of  $n = 10$  per group from four experiments; error bars are the SD. (A(left), C(left), F(left)) Kruskal-Wallis test, (A-F) Student's t test.
